# Supplementary material for: Development of Starch-Based Antifungal Coatings by Incorporation of Natamycin/Methyl-β-Cyclodextrin Inclusion Complex for Postharvest Treatments on Cherry Tomato against Botrytis cinerea
Source: PubMed Central journal article supplement (PMC6864615; doi:10.3390/molecules24213962), 2019-11-01
Supplement: molecules-24-03962-s001.pdf [file molecules-24-03962-s001.pdf]

## Supplementary Materials

# Development of starch-based antifungal coatings by incorporation of natamycin/methyl- $\beta$ -cyclodextrin inclusion complex for postharvest treatments on cherry tomato against *Botrytis cinerea*

Yuexi Yang<sup>1</sup>, Chen Huan<sup>1</sup>, Xianrui Liang<sup>2</sup>, Sheng Fang<sup>1</sup>, Jian Wang<sup>1</sup> and Jie Chen<sup>1,\*</sup>

<sup>1</sup> School of Food Science and Biotechnology, Zhejiang Gongshang University, Hangzhou 310018, China; [yyx\\_526@126.com](mailto:yyx_526@126.com) (Y.Y.); [huanchen@zjgsu.edu.cn](mailto:huanchen@zjgsu.edu.cn) (C.H.); [fszjgsu@163.com](mailto:fszjgsu@163.com) (S.F.); [kaiser712h@sina.com](mailto:kaiser712h@sina.com) (J.W.); [chenjie@zjgsu.edu.cn](mailto:chenjie@zjgsu.edu.cn) (J.C.)

<sup>2</sup> College of Pharmaceutical Sciences, Zhejiang University of Technology, Hangzhou 310014, China; [liangxrvicky@zjut.edu.cn](mailto:liangxrvicky@zjut.edu.cn) (X.L.)

\* Correspondence: [chenjie@zjgsu.edu.cn](mailto:chenjie@zjgsu.edu.cn); Tel.: +86-1351-681-2119 (J.C.)

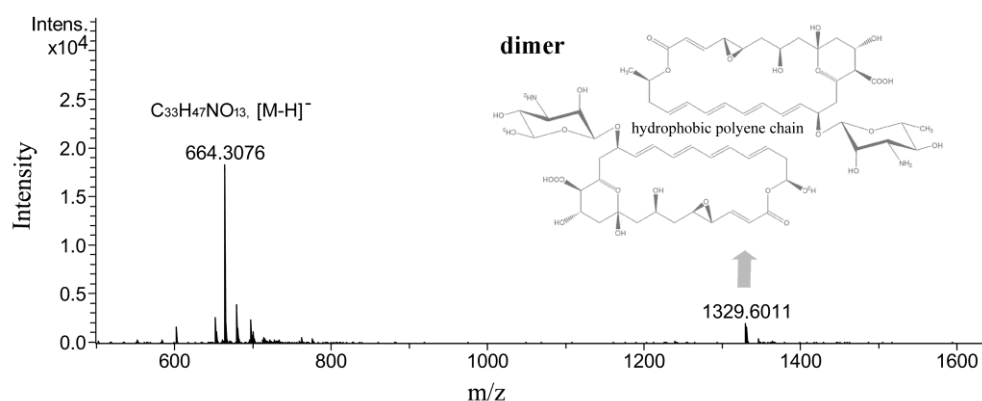

Figure S1. Mass spectrum of natamycin and its dimer.

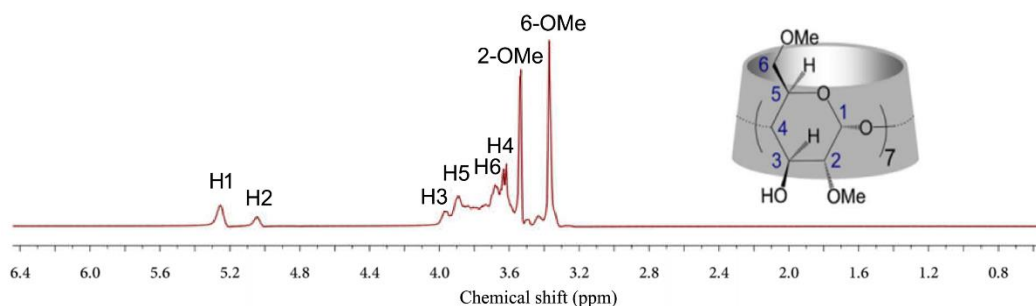

Figure S2. The <sup>1</sup>H NMR assignment of ME- $\beta$ -CD and its molecular structure in D<sub>2</sub>O.

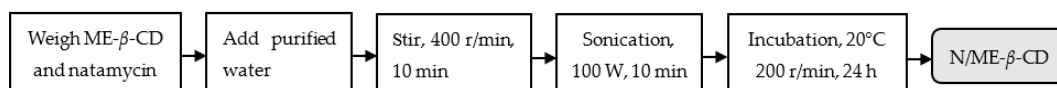

**Figure S3.** Schematic diagram of the formation of N/ME- $\beta$ -CD complex.

#### **Method S1:** Molecular docking

The structures of  $\beta$ -CD and natamycin were got from the crystallographic parameters provided by the Structural Data Base System of the RCSB Protein Data Bank. The structure of ME- $\beta$ -CD was modified using GaussView by adding 14 methyl groups in position 2 and 6 of the  $\beta$ -CD. Then the ME- $\beta$ -CD molecule was optimized using PM3. Molecular docking study was carried out with the automated docking program (AutoDock 4.0.1) with Lamarckian genetic algorithm (LGA) [1,2]. AutoDock defines the conformational space implementing grids over all the possible search space. A grid of 100 Å by the side and 0.375 Å spacing between each point. The center of the ME- $\beta$ -CD was set as the center of the box. The initial torsions and positions of natamycin were generated randomly. The ligand and receptor files were processed using the AutoDock Tools [1,2].

#### References:

1. Morris, G. M.; Goodsell, D. S.; Halliday, R.S.; Huey, R.; Hart, W. E.; Belew, R. K.; Olson, A. J. Automated Docking Using a Lamarckian Genetic Algorithm and an Empirical Binding Free Energy Function. *J. Comput. Chem.* **1998**, *19*, 1639–1662. doi: 10.1002/(SICI)1096-987X(19981115)19:14<1639::AID-JCC10>3.0.CO;2-B
2. Morris, G. M.; Huey, R.; Lindstrom, W.; Sanner, M. F.; Belew, R. K.; Goodsell, D. S.; Olson, A. J. Autodock4 and AutoDockTools4: automated docking with selective receptor flexibility. *J. Comput. Chem.* **2009**, *16*, 2785–2791. doi: 10.1002/jcc.21256
